# Supplementary material for: Paeniclostridium sordellii and Clostridioides difficile encode similar and clinically relevant tetracycline resistance loci in diverse genomic locations
Source: PubMed Central journal article supplement (PMC6399922; doi:10.1186/s12866-019-1427-5), 2019-03-04
Supplement: 12866_2019_1427_MOESM2_ESM.pdf [file 12866_2019_1427_MOESM2_ESM.pdf]

| Isolate             | Characteristics                    | Tet P | MIC | Alignment sequence accession no. | Sequencing data accession no. |
|---------------------|------------------------------------|-------|-----|----------------------------------|-------------------------------|
| <i>P. sordellii</i> |                                    |       |     |                                  |                               |
| AM370               | Unknown isolate                    | ✓     |     | CP014150                         | SRR3109670                    |
| ATCC 9714 [1, 2]    | Reference, human, oedema           |       | ✓   | LN679998                         | ERR197376                     |
| DA108 [2, 3]        | Human, non-fatal endometriosis     |       | ✓   | N/A                              | ERR197377                     |
| E204 [2]            | Human, clinical isolate            |       | ✓   | N/A                              | ERR197393                     |
| JGS444 [2]          | Bovine, myonecrosis                |       | ✓   | N/A                              | ERR197398                     |
| JGS445 [2]          | Bovine, myonecrosis                |       | ✓   | N/A                              | ERR197372                     |
| JGS6364 [2]         | Bovine, myonecrosis                |       | ✓   | N/A                              | ERR197397                     |
| JGS6382 [2, 4]      | Bovine, myonecrosis                |       | ✓   | N/A                              | ERR197373                     |
| JGS6956 [2]         | Veterinary isolate                 |       |     | N/A                              | ERR197374                     |
| JGS6961 [2]         | Veterinary isolate                 | ✓     |     | CDNI01000025                     | ERR197375                     |
| R15892 [2]          | Human, clinical isolate            | ✓     | ✓   | CEKU01000007                     | ERR197394                     |
| R26833 [2]          | Human, blood isolate from diabetic |       |     | N/A                              | ERR197360                     |
| R27882 [2]          | Human, knee amputation             |       |     | N/A                              | ERR197359                     |
| R28058 [2]          | Human, crushed hand                | ✓     | ✓   | BK010450                         | ERR197358                     |
| R29426 [2]          | Human, sudden death                |       |     | N/A                              | ERR197357                     |
| R30684 [2]          | Human, calf abscess                |       |     | N/A                              | ERR197356                     |
| R31809 [2]          | Human, knee injury                 |       |     | N/A                              | ERR197355                     |
| R32462 [2]          | Human, endo-cervical discharge     | ✓     |     | CEMX01000019                     | ERR197354                     |
| R32668 [2]          | Human, wound                       |       |     | N/A                              | ERR197353                     |
| R32921 [2]          | Human, death during pregnancy      |       |     | N/A                              | ERR197352                     |
| R32977 [2]          | Human, knee replacement            | ✓     |     | CELC01000006                     | ERR197351                     |
| SSCC18392 [2]       | Human, blood isolate               | ✓     | ✓   | CDNE01000023                     | ERR197383                     |
| SSCC18838 [2]       | Human, blood isolate               | ✓     | ✓   | CDNK01000006                     | ERR197382                     |
| SSCC26591 [2]       | Human, blood isolate               |       | ✓   | N/A                              | ERR197380                     |
| SSCC32135 [2]       | Human, blood isolate               | ✓     | ✓   | CDNQ01000027                     | ERR197386                     |
| SSCC33587 [2]       | Human, blood isolate               |       | ✓   | N/A                              | ERR197385                     |

|                              |                                                       |   |   |                        |            |
|------------------------------|-------------------------------------------------------|---|---|------------------------|------------|
| SSCC33589 [2]                | Human, blood isolate                                  |   | ✓ | N/A                    | ERR197378  |
| SSCC35109 [2]                | Human, blood isolate                                  |   | ✓ | N/A                    | ERR197384  |
| SSCC37615 [2]                | Human, blood isolate                                  | ✓ | ✓ | BK010451               | ERR197381  |
| SSCC42239 [2]                | Human, blood isolate                                  |   | ✓ | N/A                    | ERR197379  |
| UMC1 [2, 5]                  | Human, allograft isolate                              |   | ✓ | N/A                    | ERR197387  |
| UMC2 [2, 5]                  | Human, allograft isolate                              |   | ✓ | N/A                    | ERR197388  |
| W10 [2]                      | Veterinary isolate                                    |   |   | N/A                    | ERR197362  |
| UMC164 [2, 5]                | Human, allograft isolate                              |   | ✓ | N/A                    | ERR197389  |
| UMC178 [2, 5]                | Human, allograft isolate                              |   | ✓ | N/A                    | ERR197390  |
| UMC4401 [2, 5]               | Human, allograft isolate                              |   | ✓ | N/A                    | ERR197391  |
| UMC4404 [2, 5]               | Human, allograft isolate                              |   | ✓ | N/A                    | ERR197392  |
| W2922 [2]                    | Veterinary isolate                                    | ✓ |   | CELK01000144, BK010701 | ERR197363  |
| W2945 [2]                    | Veterinary isolate                                    | ✓ |   | CELI01000026           | ERR197364  |
| W2946 [2]                    | Veterinary isolate                                    | ✓ |   | N/A                    | ERR197365* |
| W2947 [2]                    | Veterinary isolate                                    |   |   | N/A                    | ERR197366* |
| W2948 [2]                    | Veterinary isolate                                    |   |   | N/A                    | ERR197367  |
| W2967 [2]                    | Veterinary isolate                                    |   |   | N/A                    | ERR197361  |
| W2975 [2]                    | Veterinary isolate                                    |   |   | N/A                    | ERR197368  |
| W3025 [2]                    | Veterinary isolate                                    |   |   | N/A                    | ERR197369  |
| W3026 [2]                    | Veterinary isolate                                    | ✓ |   | CELD01000042           | ERR197370  |
| <b><i>C. perfringens</i></b> |                                                       |   |   |                        |            |
| Strain 13 [6]                | Reference, Tet <sup>S</sup>                           |   | ✓ | N/A                    | N/A        |
| JIR4 [7]                     | Strain 13 background, contains pCW3, Tet <sup>R</sup> | ✓ | ✓ | N/A                    | N/A        |
| CW92 [7, 8]                  | WT isolate, contains pCW3                             | ✓ |   | DQ366035               | N/A        |
| <b><i>C. difficile</i></b>   |                                                       |   |   |                        |            |
| Strain 630 [9, 10]           | Human, pseudomembranous colitis, Tet <sup>R</sup>     |   | ✓ | CP010905               | N/A        |
| CD37 [11]                    | Clinical isolate, Tet <sup>S</sup>                    |   | ✓ | N/A                    | N/A        |
| MCD43                        | Human, clinical isolate                               | ✓ | ✓ | MH041492               | N/A        |
| MCD46                        | Human, clinical isolate                               | ✓ | ✓ | MH041493               | N/A        |
| P12 [12]                     | Porcine isolate                                       | ✓ |   | ERS1078747             | N/A        |
| 08ACD0030                    | Unknown                                               |   |   | CP010888               | N/A        |

\* Sequencing data indicates mixed isolates

### Strain/Sequence References

1. Hall IC, Scott, J.P.: ***Bacillus sordellii*, a Cause of Malignant Edema in Man.** *J Infect Dis* 1927, **41**:329-335.
2. Couchman EC, Browne HP, Dunn M, Lawley TD, Songer JG, Hall V, Petrovska L, Vidor C, Awad M, Lyras D *et al*: ***Clostridium sordellii* genome analysis reveals plasmid localized toxin genes encoded within pathogenicity loci.** *BMC Genomics* 2015, **16**(1):392.
3. Hao Y, Senn T, Opp JS, Young VB, Thiele T, Srinivas G, Huang SK, Aronoff DM: **Lethal toxin is a critical determinant of rapid mortality in rodent models of *Clostridium sordellii* endometritis.** *Anaerobe* 2010, **16**(2):155-160.
4. Walk ST, Jain R, Trivedi I, Grossman S, Newton DW, Thelen T, Hao Y, Songer JG, Carter GP, Lyras D *et al*: **Non-toxicogenic *Clostridium sordellii*: Clinical and microbiological features of a case of cholangitis-associated bacteremia.** *Anaerobe* 2011, **17**(5):252-256.
5. Voth DE, Martinez OV, Ballard JD: **Variations in lethal toxin and cholesterol-dependent cytolysin production correspond to differences in cytotoxicity among strains of *Clostridium sordellii*.** *FEMS Microbiol Lett* 2006, **259**(2):295-302.
6. Lyrastis M, Bryant AE, Sloan J, Awad MM, Nisbet IT, Stevens DL, Rood JI: **Identification and molecular analysis of a locus that regulates extracellular toxin production in *Clostridium perfringens*.** *Mol Microbiol* 1994, **12**(5):761-777.
7. Rood JI: **Transferable tetracycline resistance in *Clostridium perfringens* strains of porcine origin.** *Can J Microbiol* 1983, **29**(10):1241-1246.
8. Bannam TL, Teng WL, Bulach D, Lyras D, Rood JI: **Functional identification of conjugation and replication regions of the tetracycline resistance plasmid pCW3 from *Clostridium perfringens*.** *J Bacteriol* 2006, **188**(13):4942-4951.
9. Wüst J, Sullivan NM, Hardegger U, Wilkins TD: **Investigation of an outbreak of antibiotic-associated colitis by various typing methods.** *J Clin Microbiol* 1982, **16**(6):1096-1101.
10. Riedel T, Bunk B, Thürmer A, Spröer C, Brzuszkiewicz E, Abt B, Gronow S, Liesegang H, Daniel R, Overmann J: **Genome Resequencing of the Virulent and Multidrug-Resistant Reference Strain *Clostridium difficile* 630.** *Genome Announcements* 2015, **3**(2).
11. Smith CJ, Markowitz SM, Macrina FL: **Transferable tetracycline resistance in *Clostridium difficile*.** *Antimicrob Agents Chemother* 1981, **19**(6):997-1003.
12. Knight DR, Squire MM, Collins DA, Riley TV: **Genome Analysis of *Clostridium difficile* PCR Ribotype 014 Lineage in Australian Pigs and Humans Reveals a Diverse Genetic Repertoire and Signatures of Long-Range Interspecies Transmission.** *Front Microbiol* 2017, **7**(2138).
