# Supplementary material for: Paeniclostridium sordellii and Clostridioides difficile encode similar and clinically relevant tetracycline resistance loci in diverse genomic locations
Source: PubMed Central journal article supplement (PMC6399922; doi:10.1186/s12866-019-1427-5), 2019-03-04
Supplement: 12866_2019_1427_MOESM4_ESM.pdf [file 12866_2019_1427_MOESM4_ESM.pdf]

*Cp* CW92 TAAAAAAGACTCTATAATTTAGAGTCTTTTTTGATTTTAAATTAATTTGGATAAAATATAA 60  
 R28058 CGTTTTAATGTATTC-----GTTTCCAAATAATAATAAGTAATAAGAAAAATAAATATAA 55  
 W2945 CTTTTGTGTATATAAGTTATTTTGAAGTAATAAAGTTTCAATTGAATTTGGATAAAATATGA 60  
*Cd* MCD46 CTTTTGTGTATATAAGTTATTTTGAAGTAATAAAGTTTCAATTGAATTTGGATAAAATATGA 60  
 SSCC18392 -----GTGTATATAAGTTATTTTGAAGTAATAAAGTTTCAATTGAATTTGGATAAAATATGA 55  
*Cd* P12 -----GTGTATATAAGTTATTTTGAAGTAATAAAGTTTCAATTGAATTTGGATAAAATATAA 55  
 \* \* \* \* \*

Promoter P3

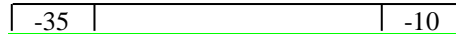

*Cp* CW92 ATATAAAAATATTTGAAAAAAAAAATAAAAAAAAAATATAAATGTAGTTATGCTAAAAATATAA 120  
 R28058 AAGTAAAAGCATTTGAAGAAAAATTAATAATTTATATATAATGTAATTATACTAAAAATATAA 115  
 W2945 ATATAAAAAGTATTTGAAAAA-AAATAAAAAGTTTATATATAATGTAATTATACTAAAAATATAA 119  
*Cd* MCD46 ATATAAAAAGTATTTGAAAAA-AAATAAAAAGTTTATATATAATGTAATTATACTAAAAATATAA 119  
 SSCC18392 ATATAAAAAGTATTTGAAAAAAAAAATAAAAAGTTTATATATAATGTAATTATACTAAAAATATAA 115  
*Cd* P12 ATATAAAAAGTATTTGAAAAAATAAAAAGTTTATATATAATGTAATTATACTAAAAATATAA 115  
 \* \* \* \* \*

*Cp* CW92 ACATGAAAAATATAAATGTAAAGGTGTTGTAATATGCGCAAAGAGGTAATTTTTAATTA 180  
 R28058 ACATGAAAAATATAAATGTAAAGGGTTATAAATATGCGCAAAGAGGTAGTTTTTAACTA 175  
 W2945 ACATGAAAAATATAAATGTAAAGGAGATGTAATATGCGCAAAGAGGTAGTTTTTAACTA 179  
*Cd* MCD46 ACATGAAAAATATAAATGTAAAGGAGATGTAATATGCGCAAAGAGGTAGTTTTTAACTA 179  
 SSCC18392 ACATGAAAAATATAAATGTAAAGGAGATGTAATATGCGCAAAGAGGTAGTTTTTAACTA 175  
*Cd* P12 ACATGAAAAATATAAATGTAAAGGAGATGTAATATGCGCAAAGAGGTAGTTTTTAACTA 175  
 \* \* \* \* \*

*Cp* CW92 AATTAACGAATAAGGATTATTTTTAAAAAGTATATGAA--AAATCTTGAATAACTCAAGG 238  
 R28058 AACTAACTGAATAAGGATTATTTTTAAAAAGTATATGAAA-AAATCTTGAATAACTCAAGG 234  
 W2945 AACTAACTGAATAAGGATTATTTTTAAAAAGTATATGAAAAAATCTTGGATAACTCAAGG 239  
*Cd* MCD46 AACTAACTGAATAAGGATTATTTTTAAAAAGTATATGAAAAAATCTTGGATAACTCAAGG 239  
 SSCC18392 AACTAACTGAATAAGGATTATTTTTAAAAAGTATATGAAAAAATCTTGGATAACTCAAGG 235  
*Cd* P12 AACTAACTGAATAAGGATTATTTTTAAAAAGTATATGAAAAAATCTTGGATAACTCAAGG 235  
 \*\* \* \* \* \* \*

*Cp* CW92 TTTATTTGTGGTGGAATCAATTATTTATAATATTGATATTACCATGTTTATTTGTGTACT 298  
 R28058 TTTATTTGTGGTAGAATCAATTATTGATAATATTGATATTACCATGTTTATTTGTGTACT 294  
 W2945 TTTATTTGTGGTAGAAACAATTATTAATAATATTGATATTACCATGTCTATTTGTGTACT 299  
*Cd* MCD46 TTTATTTGTGGTAGAAACAATTATTAATAATATTGATATTACCATGTCTATTTGTGTACT 299  
 SSCC18392 TTTATTTGTGGTAGAAACAATTATTAATAATATTGATATTACCATGTCTATTTGTGTACT 295  
*Cd* P12 TTTATTTGTGGTAGAAACAATTATTAATAATATTGATATTACCATGTCTATTTGTGTACT 295  
 \* \* \* \* \*

*Cp* CW92 CTAAAAATAATCAGTATTATAATGAGCATGTTACATCTTTATTTGCAGGATAGGAAAACC 358  
 R28058 CTAAAAATAATCAGTATTATAATGAGCATGTTACACCTCTATTTGCAGAATGGGAAAACCT 354  
 W2945 CTAAAAATAATCAGTATTATAATGAGCATATTACATCTTTATTTGAAGAATAGGAAAACCT 359  
*Cd* MCD46 CTAAAAATAATCAGTATTATAATGAGCATATTACATCTTTATTTGAAGAATAGGAAAACCT 359  
 SSCC18392 CTAAAAATAATCAGTATTATAATGAGCATATTACATCTTTATTTGAAGAATAGGAAAACCT 355  
*Cd* P12 CTAAAAATAATCAGTATTATAATGAGCATATTACATCTTTATTTGAAGAATAGGAAAACCT 355  
 \* \* \* \* \*

*Cp* CW92 GTGTTCTAAACACGGTATTTTTATGTCTATTTTGTCTATATA--TAGATATGGTATAAGA 416  
 R28058 GTGTTCTAAACACAGTATTTTTATGTCTATTTTGTCTATTTTACTATATTTATAGATATGATATAAGA 414  
 W2945 GTGTTCTAAACACGGTATTTTTATGCCTATTTTACTATATTTATAGATATGATATAAGA 419  
*Cd* MCD46 GTGTTCTAAACACGGTATTTTTATGCCTATTTTACTATATTTATAGATATGATATAAGA 419  
 SSCC18392 GTGTTCTAAACACGGTATTTTTATGCCTATTTTACTATATTTATAGATATGATATAAGA 415  
*Cd* P12 GTGTTCTAAACACGGTATTTTTATGCCTATTTTACTATATTTATAGATATGATATAAGA 415  
 \* \* \* \* \*

*Cp* CW92 TTTTAATTTGAATAGCTTAATCATAAGTTATATA-ATTAAAGTTCATATTTTATGTTTA 475  
 R28058 TTTTAATTTGAATAGCTTAATAATAAGCTATATAAAATTAAGTTCATATTTTCATGTTTA 474  
 W2945 CTTTAATTTGCATAGCTTAATCATAAGTTATATAAAATTAAGTTGTATATTTTCATGTTTA 479  
*Cd* MCD46 CTTTAATTTGCATAGCTTAATCATAAGTTATATAAAATTAAGTTGTATATTTTCATGTTTA 479  
 SSCC18392 CTTTAATTTGCATAGCTTAATCATAAGTTATATAAAATTAAGTTGTATATTTTCATGTTTA 475  
*Cd* P12 CTTTAATTTGCATAGCTTAATCATAAGTTATATAAAATTAAGTTGTATATTTTCATGTTTA 475  
 \*\*\*\*\*

*Cp* CW92 TATTTAGGTTATATGATTATGAGGCTGTAA GTGAA TTATG TTCAT TTACAGC TTTT-TTT 534  
 R28058 TATTTAGGTTATATAAATTATGAGGCTGTAA GTGAAT TATATTCAT TTACAGCCT TTTTTTT 534  
 W2945 TATTTAGGTTATATAAATTT-----TT 500  
*Cd* MCD46 TATTTAGGTTATATAAATTT-----TT 500  
 SSCC18392 TATTTAGGTTATATAAATTATGAGGCTGTAA GTGAA TTATG TTCACTTACAGC TTTT-TTT 534  
*Cd* P12 TATTTAGGTTATATAAATTATGAGGCTGTAA GTGAA TTATG TTCACTTACAGC TTTT-TTT 534  
 \*\*\*\*\* \*\*

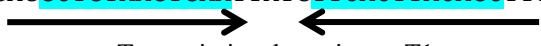
  
 Transcriptional terminator T1

*Cp* CW92 GTTTAAGGAGATTATTTTGATGATTTATATATTTAAATATGAAGATTATGAAAAACAAAC 594  
 R28058 GTTTAAGGAGATTATTTTGATGATTTATATATTTAAATATGAAGTTATGAAAAACAAAC 594  
 W2945 ATTTAAGGAGATTATTTTGATGATTTATATATTTAAATATGAAGATTATGAAAAACAAAT 560  
*Cd* MCD46 ATTTAAGGAGATTATTTTGATGATTTATATATTTAAATATGAAGATTATGAAAAACAAAT 560  
 SSCC18392 ATTTAAGGAGATTATTTTGATGATTTATATATTTAAATATGAAGATTATGAAAAACAAAT 594  
*Cd* P12 ATTTAAGGAGATTATTTTGATGATTTATATATTTAAATATGAAGATTATGAAAAACAAAT 594  
 \*\*\*\*\*

**RBS**  


*Cp* CW92 AAATTTTTTAAAGAAATACTAGGATGGTGATGATTAATGGTTAATAAACTT 644  
 R28058 AAATTTTTTAAAGAAATACTAGGATGGTGATGATTAATGGTTAATAAACTT 644  
 W2945 AAATTTTTTAAAAATACTAGGATGGTGATTATTAATGGTTAATAAACTT 610  
*Cd* MCD46 AAATTTTTTAAAAATACTAGGATGGTGATTATTAATGGTTAATAAACTT 610  
 SSCC18392 AAATTTTTTAAAAATACTAGGATGGTGATTATTAATGGTTAATAAACTT 644  
*Cd* P12 AAATTTTTTAAAAATACTAGGATGGTGATTATTAATGGTTAATAAACTT 644  
 \*\*\*\*\*


  
*tetA*(P)
