# Supplementary material for: Paeniclostridium sordellii and Clostridioides difficile encode similar and clinically relevant tetracycline resistance loci in diverse genomic locations
Source: PubMed Central journal article supplement (PMC6399922; doi:10.1186/s12866-019-1427-5), 2019-03-04
Supplement: 12866_2019_1427_MOESM5_ESM.pdf [file 12866_2019_1427_MOESM5_ESM.pdf]

|           |                                                                       |      |
|-----------|-----------------------------------------------------------------------|------|
| W2945     | CTAAGATGACTTCCCTCATCAACTTATGAAGTTAATTCTTTTAGAACAGGTTTATAGAT           | 60   |
| JGS6961   | CTAAGATGACTTCCCTCATCAACTTATGAAGTTAATTCTTTTAGAACAGGTTTATAGAT           | 60   |
| SSCC18392 | CTAAGATGACTTCCCTCATCAACTTATGAAGTTAATTCTTTTAGAACAGGTTTATAGAT           | 60   |
| SSCC32135 | CTAAGATGACTTCCCTCATCAACTTATGAAGTTAATTCTTTTAGAACAGGTTTATAGAT           | 60   |
| R32462    | CTAAGATGACTTCCCTCATCAACTTATGAAGTTAATTCTTTTAGAACAGGTTTATAGAT           | 60   |
|           | *****                                                                 |      |
| W2945     | CTTTTAGAATAAATAACAAT <b>GAACCGTATCACAAGTAAG</b> -----                 | 159  |
| JGS6961   | CTTTTAGAATAAATAACAAT <b>GAACCGTATCACAAGTAAG</b> GTAGCGGGATGATAAGAGTA  | 180  |
| SSCC18392 | CTTTTAGAATAAATAACAAT <b>GAACCGTATCACAAGTAAG</b> GTAGCGGGATGATAAGAGTA  | 180  |
| SSCC32135 | CTTTTAGAATAAATAACAAT <b>GAACCGTATCACAAGTAAG</b> GTAGCGGGATGATAAGAGTA  | 180  |
| R32462    | CTTTTAGAATAAATAACAAT <b>GAACCGTATCACAAGTAAG</b> GTAGCGGGATGATAAGAGTA  | 180  |
|           | *****                                                                 |      |
|           | ----->                                                                |      |
| W2945     | -----                                                                 | 159  |
| JGS6961   | AAAATTTAGATATATAATTTAGATCTTAGTTATACTTAAAAATAATTAGTACGATAATA           | 240  |
| SSCC18392 | AAAATTTAGATATATAATTTAGATCTTAGTTATACTTAAAAATAATTAGTACGATAATA           | 240  |
| SSCC32135 | AAAATTTAGATATATAATTTAGATCTTAGTTATACTTAAAAATAATTAGTACGATAATA           | 240  |
| R32462    | AAAATTTAGATATATAATTTAGATCTTAGTTATACTTAAAAATAATTAGTACGATAATA           | 240  |
| W2945     | -----                                                                 | 159  |
| JGS6961   | TATGTATAGATAATATCGATAAAAAGTATATTACTAAAAATTATAATGTTAGTATGAGGA          | 300  |
| SSCC18392 | TATGTATAGATAATATCGATAAAAAGTATATTACTAAAAATTATAATGTTAGTATGAGGA          | 300  |
| SSCC32135 | TATGTATAGATAATATCGATAAAAAGTATATTACTAAAAATTATAATGTTAGTATGAGGA          | 300  |
| R32462    | TATGTATAGATAATATCGATAAAAAGTATATTACTAAAAATTATAATGTTAGTATGAGGA          | 300  |
| W2945     | -----                                                                 | 159  |
| JGS6961   | GTGATTATAC <b>ATGGATATGCTTACCAATTTCAATAAAGTTATGGAGTATATAGAAATGCA</b>  | 420  |
| SSCC18392 | GTGATTATAC <b>ATGGATATGCTTACCAATTTCAATAAAGTTATGGAGTATATAGAAATGCA</b>  | 420  |
| SSCC32135 | GTGATTATAC <b>ATGGATATGCTTACCAATTTCAATAAAGTTATGGAGTATATAGAAATGCA</b>  | 420  |
| R32462    | GTGATTATAC <b>ATGGATATGCTTACCAATTTCAATAAAGTTATGGAGTATATAGAAATGCA</b>  | 420  |
|           | └──┘                                                                  |      |
|           | START                                                                 |      |
|           | . . .                                                                 |      |
| W2945     | -----                                                                 | 159  |
| JGS6961   | TGTTTATAGCGAAATTTGGATTGGGGTAAAAGAAAAG <b>TAA</b> TTAGAACTGAAATTTTATTC | 1200 |
| SSCC18392 | TGTTTATAGCGAAATTTGGATTGGGGTAAAAGAAAAG <b>TAA</b> TTAGAACTGAAATTTTATTC | 1200 |
| SSCC32135 | TGTTTATAGCGAAATTTGGATTGGGGTAAAAGAAAAG <b>TAA</b> TTAGAACTGAAATTTTATTC | 1200 |
| R32462    | TGTTTATAGCGAAATTTGGATTGGGGTAAAAGAAAAG <b>TAA</b> TTAGAACTGAAATTTTATTC | 1200 |
|           | └──┘                                                                  |      |
|           | STOP                                                                  |      |
| W2945     | -----                                                                 | 159  |
| JGS6961   | TATATCACAGTTAAAGGTACCTTGAATAATTTAAGGTGCCTTTTGATACTTATTTAGAAT          | 1260 |
| SSCC18392 | TATATCACAGTTAAAGGTACCTTGAATAATTTAAGGTGCCTTTTGATACTTATTTAGAAT          | 1260 |
| SSCC32135 | TATATCACAGTTAAAGGTACCTTGAATAATTTAAGGTGCCTTTTGATACTTATTTAGAAT          | 1260 |
| R32462    | TATATCACAGTTAAAGGTACCTTGAATAATTTAAGGTGCCTTTTGATACTTATTTAGAAT          | 1260 |
| W2945     | -----TGCGAACTTTACCAAATTTGGATATATAAAT                                  | 190  |
| JGS6961   | AACTATTAAG <b>GAACCGTATCACAAGTAAG</b> TGCGAACTTTACCAAATTTGGATATATAAAT | 1320 |
| SSCC18392 | AACTATTAAG <b>GAACCGTATCACAAGTAAG</b> TGCGAACTTTACCAAATTTGGATATATAAAT | 1320 |
| SSCC32135 | AACTATTAAG <b>GAACCGTATCACAAGTAAG</b> TGCGAACTTTACCAAATTTGGATATATAAAT | 1320 |
| R32462    | AACTATTAAG <b>GAACCGTATCACAAGTAAG</b> TGCGAACTTTACCAAATTTGGATATATAAAT | 1320 |
|           | -----> *****                                                          |      |
| W2945     | GAAAGGTAGGCTGCTTTAATTTCTGCAATGAAACTCACAAAAATCTAAAATTTGAATTTT          | 250  |
| JGS6961   | GAAAGGTAGGCTGCTTTAATTTCTGCAATGAAACTCACAAAAATCTAAAATTTGAATTTT          | 1380 |
| SSCC18392 | GAAAGGTAGGCTGCTTTAATTTCTGCAATGAAACTCACAAAAATCTAAAATTTGAATTTT          | 1380 |
| SSCC32135 | GAAAGGTAGGCTGCTTTAATTTCTGCAATGAAACTCACAAAAATCTAAAATTTGAATTTT          | 1380 |
| R32462    | GAAAGGTAGGCTGCTTTAATTTCTGCAATGAAACTCACAAAAATCTAAAATTTGAATTTT          | 1380 |
|           | *****                                                                 |      |
