# Supplementary material for: Paeniclostridium sordellii and Clostridioides difficile encode similar and clinically relevant tetracycline resistance loci in diverse genomic locations
Source: PubMed Central journal article supplement (PMC6399922; doi:10.1186/s12866-019-1427-5), 2019-03-04
Supplement: 12866_2019_1427_MOESM8_ESM.pdf [file 12866_2019_1427_MOESM8_ESM.pdf]

| <b>Primer</b> | <b>Sequence (5'-3')</b>              | <b>Use</b>                                                                 |
|---------------|--------------------------------------|----------------------------------------------------------------------------|
| DLP134        | CAGAGGATAGAAGCAGGGGATATAGG           | Internal <i>P. sordellii tetB</i> (P) (+), generation of probe             |
| DLP101        | CTAATTGCGTTTAATTTATGAAGCAAATAC       | Internal <i>P. sordellii tetB</i> (P) (-), generation of probe             |
| DLP104        | GGTGGTTGATAGAGTTGGAGGTATTG           | Internal <i>P. sordellii tetA</i> (P) (+), screening of transconjugants    |
| DLP105        | TTGCTTCCTGCATCATATACTTCTTG           | Internal <i>P. sordellii tetB</i> (P) (-), screening of transconjugants    |
| JRP2094       | CACAGATTGTATGGGGATTAGG               | Internal <i>C. perfringens tetA</i> (P) (+), generation of probe           |
| JRP2095       | CATTTATAGAAAGCACAGTAGC               | Internal <i>C. perfringens tetA</i> (P) (-), generation of probe           |
| JRP4589       | TTACAGTTCAAACCCAACCTATGG             | Internal <i>sdl</i> (+), generation of probe, screening of transconjugants |
| JRP4590       | TGCAGCTTGACATCTTGCTCTTA              | Internal <i>sdl</i> (-), generation of probe, screening of transconjugants |
| JRP2873       | GTGAGGTTATGTTAATTATATGGTATAATTCAATGC | Internal <i>C. perfringens plc</i> (+), screening of transconjugants       |
| JRP2874       | AGTTACAATCATAGCATGAGTTCCTGTTCC       | Internal <i>C. perfringens plc</i> (-), screening of transconjugants       |
