# Supplementary material for: Paeniclostridium sordellii and Clostridioides difficile encode similar and clinically relevant tetracycline resistance loci in diverse genomic locations
Source: BMC Microbiol. 2019 Mar 4;19:53. doi: 10.1186/s12866-019-1427-5 (PMC6399922; doi:10.1186/s12866-019-1427-5)
Supplement: Supplementary file 3 — Table S1. Matrices displaying the nucleotide identity (%) of the Tet P regulatory region comprising 650 bp directly upstream of the tetA(P) start codon, as well as the amino acid identity (%) of TetA(P) and TetB(P), from isolates of P. sordellii and C. difficile (Cd) compared with that of pCW3 from C. perfringens (Cp) CW92. (PDF 167 kb) [file 12866_2019_1427_MOESM3_ESM.pdf]

[illegible][illegible]

[illegible]
